# Supplementary figures and images for: DNA damage and expression profile of genes associated with nephrotoxicity induced by butralin and ameliorating effect of Arabic gum in female rats
Source: Research Square preprint supplement (doi:10.21203/rs.3.rs-280861/v1), 2021-03-12

| 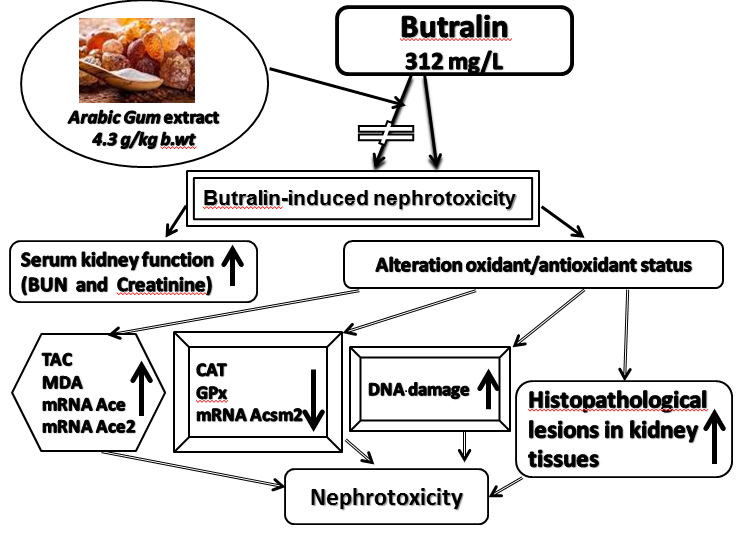 |
| --- |

Supplement: Supplementary file 1 [file 7215ded9cb7db5b9bec393ca.docx]
